# Supplementary material
Source: MDPI journal article supplement (https://www.mdpi.com/2071-1050/14/15/9454)
Supplement: s1 [file s1]

## Supplementary information:

Development of bio-electrochemical reactor for groundwater purification:

Effect of electric current and water hardness

Khakhanang Ratananikom, Prarunchaya Peungtim, Patcharaporn Phuinthiang,  
Aupatham Nakaruk, and Wilawan Khanitchaidecha

Corresponding Authors: wilawank1@gmail.com

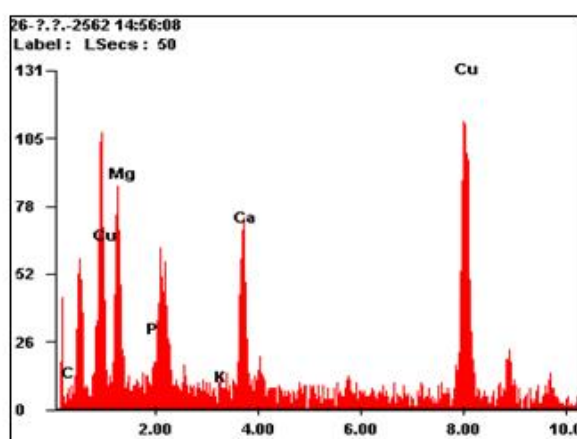

| <i>Element</i> | <i>Wt%</i> | <i>At%</i> |
|----------------|------------|------------|
| <i>C</i>       | 06.41      | 20.75      |
| <i>Mg</i>      | 16.80      | 26.87      |
| <i>P</i>       | 03.57      | 04.48      |
| <i>K</i>       | 00.58      | 00.57      |
| <i>Ca</i>      | 08.06      | 07.82      |
| <i>Cu</i>      | 64.58      | 39.52      |

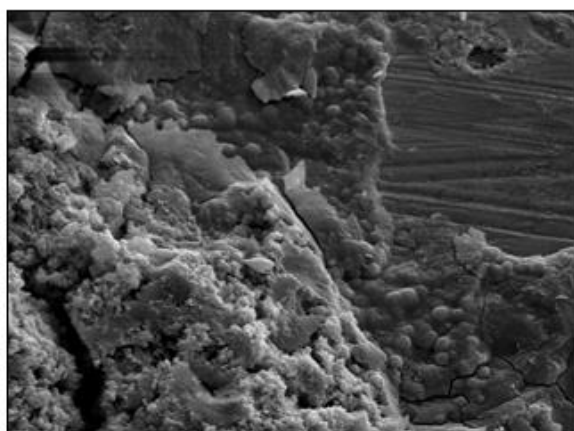

Figure S1. SEM-EDS analysis in the biofilm of BER-10

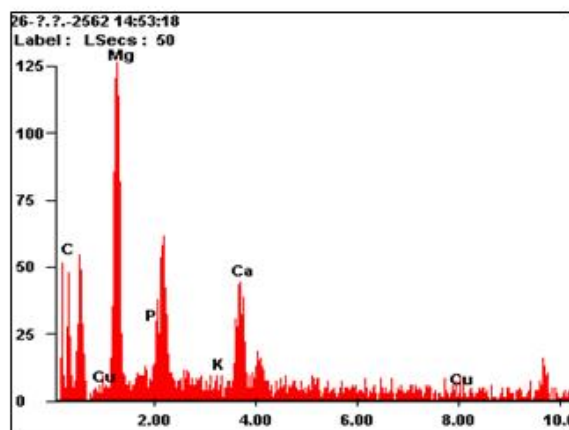

| <i>Element</i> | <i>Wt%</i> | <i>At%</i> |
|----------------|------------|------------|
| <i>C</i>       | 57.43      | 77.12      |
| <i>Mg</i>      | 22.83      | 15.15      |
| <i>P</i>       | 04.02      | 02.09      |
| <i>K</i>       | 00.26      | 00.11      |
| <i>Ca</i>      | 10.79      | 04.34      |
| <i>Cu</i>      | 04.68      | 01.19      |

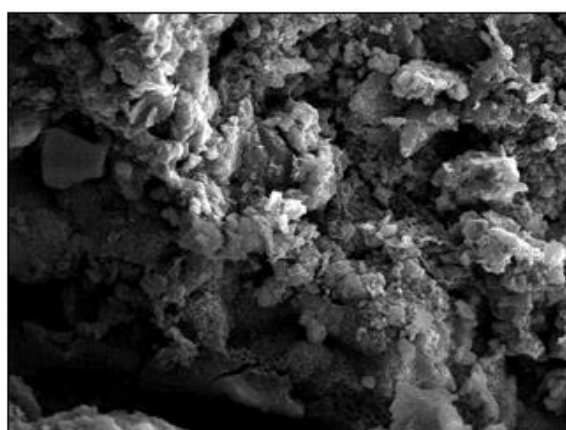

Figure S2. SEM-EDS analysis in the biofilm of BER-20
